# Supplementary material for: The Prostate Cancer Cells Resistant to Docetaxel as in vitro Model for Discovering MicroRNAs Predictive of the Onset of Docetaxel Resistance
Source: MDPI journal article supplement (doi:10.3390/ijms18071512), 2017-07-13
Supplement: s1 [file s1]

# Supplementary Materials: The Prostate Cancer Cells Resistant to Docetaxel as in vitro Model for Discovering MicroRNAs Predictive of the Onset of Docetaxel Resistance

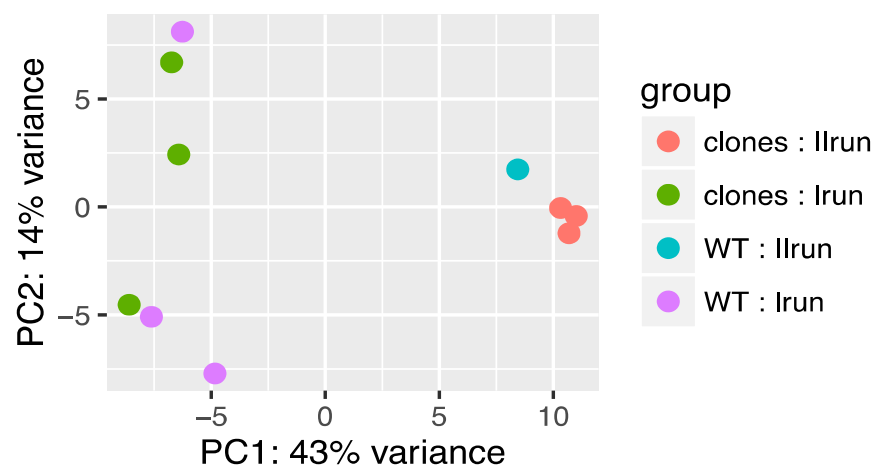

**Figure S1.** Principal component analysis (PCA) of DU-145/DCT<sup>R</sup> clones sequencing experiment.

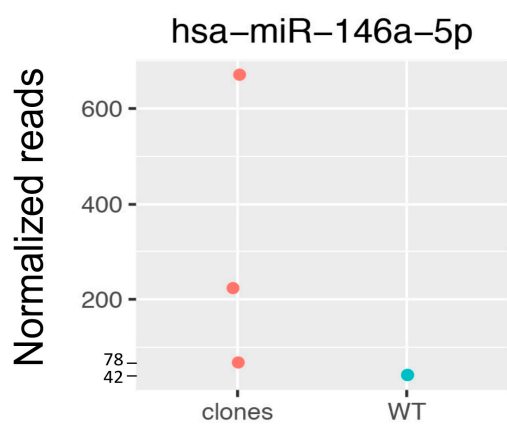

**Figure S2.** Normalized reads (NR) of miR-146a-5p in DU-145/DCT<sup>R</sup> clones (red spots) and parental cells biological replicates (blue spots) of DU-145/2.1, /3.1 and /6.7 clones.

**Table S1–S2.** List of differentially released miRNAs in 22Rv1 (**Table S1**) or DU-145 (**Table S2**) cells between DCT<sup>R</sup> clones and the correspondent parental cell lines identified by using edgeR and DESeq2 methods and using  $|\log_2FC|>1$  and  $\text{padj}\leq 0.01$  as criteria for selection. For each miRNA, base means across samples,  $\log_2$  fold changes, standard errors, test statistics, p-values and adjusted p-values are reported.
