# Supplementary material for: The Prostate Cancer Cells Resistant to Docetaxel as in vitro Model for Discovering MicroRNAs Predictive of the Onset of Docetaxel Resistance
Source: Int J Mol Sci. 2017 Jul 13;18(7):1512. doi: 10.3390/ijms18071512 (PMC5536002; doi:10.3390/ijms18071512)
Supplement: Supplementary file 1 [file ijms-18-01512-s001.zip › Supplementary Tables.xlsx]

## Sheet: Table S1
EdgeR								DESeq2
	logFC	logCPM	LR	PValue	FDR				baseMean	log2FoldChange	lfcSE	stat	pvalue	padj
hsa-mir-323a,hsa-miR-323a-3p	-3.69529	6.64102	33.5061	7.10417e-09	8.08455e-06			hsa-mir-342,hsa-miR-342-3p	44.8979	-2.24221	0.310456	-7.2223	5.1117e-13	2.89833e-10
hsa-mir-323b,hsa-miR-323b-3p	-3.84044	6.49043	30.5177	3.30838e-08	1.88247e-05			hsa-mir-30c-1,hsa-miR-30c-5p	283.62	-1.8628	0.311044	-5.98885	2.11324e-09	2.99551e-07
hsa-mir-3180-1,hsa-miR-3180-5p	-3.69241	5.55089	29.3834	5.93831e-08	2.23581e-05			hsa-mir-30c-2,hsa-miR-30c-5p	283.709	-1.86281	0.311003	-5.98968	2.10254e-09	2.99551e-07
hsa-mir-1260a,hsa-miR-1260a	-2.87898	10.2629	28.8406	7.85873e-08	2.23581e-05			hsa-mir-4792,hsa-miR-4792	2077.8	5.13913	0.851964	6.0321	1.61842e-09	2.99551e-07
hsa-mir-4792,hsa-miR-4792	5.50099	12.8559	28.3351	1.0203e-07	2.32219e-05			hsa-mir-186,hsa-miR-186-5p	1632.95	1.54956	0.275679	5.62089	1.89973e-08	2.1543e-06
hsa-mir-92b,hsa-miR-92b-3p	-2.9026	16.0492	27.7535	1.378e-07	2.61361e-05			hsa-mir-378c,hsa-miR-378c	76.2586	1.85482	0.335591	5.52703	3.25697e-08	3.07784e-06
hsa-mir-4787,hsa-miR-4787-3p	-3.28634	5.9309	27.1117	1.9203e-07	3.12185e-05			hsa-mir-25,hsa-miR-25-5p	166.268	-2.18344	0.403503	-5.41121	6.26004e-08	5.07064e-06
hsa-mir-342,hsa-miR-342-3p	-2.06592	7.55314	26.0151	3.38751e-07	4.81873e-05			hsa-let-7d,hsa-let-7d-5p	290.346	-2.35277	0.438431	-5.36634	8.03518e-08	5.69493e-06
hsa-let-7d,hsa-let-7d-5p	-2.21865	10.3868	25.3753	4.7191e-07	5.96704e-05			hsa-mir-210,hsa-miR-210-3p	67.5143	2.34817	0.443699	5.29225	1.20819e-07	7.61161e-06
hsa-mir-29c,hsa-miR-29c-3p	3.76338	7.59076	25.1387	5.33519e-07	6.07145e-05			hsa-mir-323a,hsa-miR-323a-3p	28.6782	-3.63099	0.706521	-5.13925	2.75835e-07	1.56399e-05
hsa-mir-25,hsa-miR-25-5p	-2.0922	9.30995	24.8477	6.2042e-07	6.15234e-05			hsa-mir-1260a,hsa-miR-1260a	271.034	-2.92517	0.571651	-5.11705	3.10347e-07	1.5997e-05
hsa-mir-885,hsa-miR-885-5p	-4.05768	4.93201	24.7557	6.50775e-07	6.15234e-05			hsa-mir-181a-2,hsa-miR-181a-2-3p	33.7564	-2.03862	0.39975	-5.09974	3.40116e-07	1.60705e-05
hsa-mir-1260b,hsa-miR-1260b	-2.69856	10.4133	24.6074	7.02816e-07	6.15234e-05			hsa-mir-589,hsa-miR-589-5p	234.06	2.57377	0.508246	5.06402	4.10506e-07	1.79044e-05
hsa-mir-429,hsa-miR-429	3.17816	6.53399	24.0872	9.20684e-07	7.48385e-05			hsa-mir-22,hsa-miR-22-3p	5200.89	1.80053	0.360807	4.99029	6.02894e-07	2.27894e-05
hsa-mir-5096,hsa-miR-5096	3.63281	7.50276	23.1295	1.51451e-06	0.000114901			hsa-mir-4787,hsa-miR-4787-3p	15.4617	-3.32289	0.664388	-5.00143	5.69072e-07	2.27894e-05
hsa-mir-210,hsa-miR-210-3p	2.49618	8.07787	22.1481	2.52409e-06	0.000167612			hsa-let-7d,hsa-let-7d-3p	311.782	-2.09789	0.424382	-4.94339	7.67759e-07	2.60047e-05
hsa-mir-486-1,hsa-miR-486-5p	-2.54804	15.2545	22.1029	2.58421e-06	0.000167612			hsa-mir-29c,hsa-miR-29c-3p	38.1731	3.53469	0.715469	4.94039	7.79682e-07	2.60047e-05
hsa-mir-486-2,hsa-miR-486-5p	-2.54391	15.3319	21.9795	2.75578e-06	0.000167612			hsa-mir-92a-1,hsa-miR-92a-1-5p	94.9742	-1.92569	0.390927	-4.92597	8.39429e-07	2.6442e-05
hsa-mir-589,hsa-miR-589-5p	2.72839	9.76685	21.9346	2.82108e-06	0.000167612			hsa-mir-5096,hsa-miR-5096	61.9057	3.46941	0.71434	4.85681	1.19295e-06	3.56001e-05
hsa-mir-433,hsa-miR-433-3p	-3.16467	6.21345	21.8516	2.94573e-06	0.000167612			hsa-mir-92b,hsa-miR-92b-3p	16320.6	-2.87688	0.595736	-4.82912	1.37137e-06	3.88782e-05
hsa-mir-96,hsa-miR-96-5p	3.5102	6.70303	21.7383	3.12487e-06	0.000168782			hsa-mir-3180-1,hsa-miR-3180-5p	9.90144	-3.64167	0.766858	-4.74882	2.04607e-06	4.83384e-05
hsa-mir-574,hsa-miR-574-3p	-2.52222	7.95623	21.5735	3.40523e-06	0.000168782			hsa-mir-4532,hsa-miR-4532	93.1654	4.56822	0.961724	4.75004	2.03381e-06	4.83384e-05
hsa-let-7c,hsa-let-7c-5p	-2.34361	10.8802	21.5701	3.41123e-06	0.000168782			hsa-mir-500a,hsa-miR-500a-3p	81.6288	1.65037	0.34647	4.76337	1.90387e-06	4.83384e-05
hsa-mir-150,hsa-miR-150-5p	-3.00179	5.58604	21.0372	4.50447e-06	0.000203282			hsa-mir-940,hsa-miR-940	26.569	-2.09848	0.44052	-4.76365	1.9012e-06	4.83384e-05
hsa-mir-4532,hsa-miR-4532	4.91111	8.49462	20.9946	4.60588e-06	0.000203282			hsa-mir-429,hsa-miR-429	23.4723	3.00381	0.64171	4.68094	2.85559e-06	6.47647e-05
hsa-mir-214,hsa-miR-214-3p	-2.47993	5.69854	20.9554	4.70112e-06	0.000203282			hsa-mir-1260b,hsa-miR-1260b	299.45	-2.74432	0.591025	-4.64331	3.42865e-06	7.17314e-05
hsa-mir-33b,hsa-miR-33b-5p	3.3691	7.48553	20.9063	4.82303e-06	0.000203282			hsa-mir-744,hsa-miR-744-5p	117.08	-1.60988	0.346891	-4.64088	3.46936e-06	7.17314e-05
hsa-let-7d,hsa-let-7d-3p	-2.03746	10.3086	20.7953	5.1109e-06	0.000207722			hsa-mir-92a-1,hsa-miR-92a-3p	19374.3	-2.1684	0.467673	-4.63658	3.54229e-06	7.17314e-05
hsa-mir-186,hsa-miR-186-5p	1.75705	12.5579	20.5237	5.88973e-06	0.000228066			hsa-mir-323b,hsa-miR-323b-3p	26.3594	-3.70136	0.802688	-4.61121	4.00328e-06	7.62396e-05
hsa-mir-3613,hsa-miR-3613-3p	-3.28811	4.54032	20.4843	6.01229e-06	0.000228066			hsa-mir-92a-2,hsa-miR-92a-3p	18764.2	-2.1507	0.466567	-4.60963	4.03384e-06	7.62396e-05
hsa-mir-1273g,hsa-miR-1273g-3p	3.77747	7.89553	20.3475	6.45786e-06	0.000237066			hsa-mir-345,hsa-miR-345-5p	183.539	0.95608	0.208587	4.5836	4.57033e-06	8.35928e-05
hsa-mir-331,hsa-miR-331-3p	-2.86516	7.96803	20.2752	6.70637e-06	0.000238495			hsa-mir-1273g,hsa-miR-1273g-3p	77.8354	3.63943	0.79858	4.55737	5.17974e-06	9.17785e-05
hsa-mir-19a,hsa-miR-19a-3p	3.49905	7.85071	20.0204	7.66206e-06	0.000261921			hsa-mir-19a,hsa-miR-19a-3p	54.3545	3.21246	0.713897	4.4999	6.79847e-06	0.000113374
hsa-mir-665,hsa-miR-665	-2.52884	4.52005	19.945	7.97016e-06	0.000261921			hsa-mir-3187,hsa-miR-3187-3p	34.392	-2.32482	0.516015	-4.50533	6.62684e-06	0.000113374
hsa-mir-149,hsa-miR-149-3p	-3.40481	6.32236	19.9246	8.05557e-06	0.000261921			hsa-let-7c,hsa-let-7c-5p	438.518	-2.41166	0.540018	-4.4659	7.97344e-06	0.000125582
hsa-mir-3187,hsa-miR-3187-3p	-2.2639	7.03116	19.7606	8.77716e-06	0.000277456			hsa-mir-574,hsa-miR-574-3p	59.5251	-2.61184	0.584082	-4.4717	7.75988e-06	0.000125582
hsa-mir-30c-1,hsa-miR-30c-5p	-1.70786	10.3816	19.5704	9.69597e-06	0.000295889			hsa-mir-1307,hsa-miR-1307-5p	492.584	1.60472	0.362846	4.42258	9.75283e-06	0.000149456
hsa-mir-30c-2,hsa-miR-30c-5p	-1.7078	10.3821	19.5344	9.8803e-06	0.000295889			hsa-mir-214,hsa-miR-214-3p	17.882	-2.5403	0.576354	-4.40754	1.04551e-05	0.000153119
hsa-mir-92a-1,hsa-miR-92a-3p	-2.09464	16.2609	19.4572	1.02879e-05	0.000300196			hsa-mir-33b,hsa-miR-33b-5p	42.2761	3.02562	0.686712	4.40595	1.0532e-05	0.000153119
hsa-mir-92a-2,hsa-miR-92a-3p	-2.07669	16.2134	19.1896	1.18357e-05	0.000336725			hsa-mir-760,hsa-miR-760	26.1473	-1.84952	0.421511	-4.38784	1.14483e-05	0.000162279
hsa-mir-129-2,hsa-miR-129-2-3p	-6.98184	3.26064	19.1339	1.2186e-05	0.000338236			hsa-mir-96,hsa-miR-96-5p	25.0268	3.28234	0.750772	4.37196	1.23138e-05	0.000170291
hsa-mir-873,hsa-miR-873-5p	7.97575	4.72843	19.0776	1.25508e-05	0.000340068			hsa-let-7b,hsa-let-7b-3p	143.771	-1.92076	0.44698	-4.29719	1.7298e-05	0.000222643
hsa-mir-619,hsa-miR-619-5p	3.67393	6.71692	18.7236	1.51105e-05	0.0003999			hsa-let-7e,hsa-let-7e-5p	292.006	-1.63423	0.380489	-4.29508	1.74626e-05	0.000222643
hsa-mir-6847,hsa-miR-6847-5p	-7.02858	2.7369	18.6793	1.54652e-05	0.000399985			hsa-mir-197,hsa-miR-197-3p	200.498	-1.98227	0.461803	-4.29246	1.76701e-05	0.000222643
hsa-mir-200a,hsa-miR-200a-3p	2.72564	6.72583	18.6089	1.60471e-05	0.000405813			hsa-mir-21,hsa-miR-21-5p	2525	1.81811	0.423408	4.29398	1.75495e-05	0.000222643
hsa-mir-21,hsa-miR-21-5p	2.09657	13.3161	18.5242	1.67762e-05	0.000415029			hsa-mir-1180,hsa-miR-1180-3p	72.2487	-1.86558	0.435411	-4.28465	1.83023e-05	0.000225596
hsa-mir-1910,hsa-miR-1910-5p	-4.07322	3.77663	18.4186	1.77322e-05	0.000429346			hsa-mir-19b-1,hsa-miR-19b-3p	126.67	3.11541	0.730635	4.26397	2.00825e-05	0.000239858
hsa-mir-19b-1,hsa-miR-19b-3p	3.51063	9.06979	18.3022	1.88487e-05	0.000442343			hsa-mir-19b-2,hsa-miR-19b-3p	126.989	3.11486	0.73093	4.26151	2.03054e-05	0.000239858
hsa-mir-19b-2,hsa-miR-19b-3p	3.51044	9.07436	18.2823	1.90464e-05	0.000442343			hsa-mir-1275,hsa-miR-1275	132.615	-1.90429	0.447717	-4.25332	2.10625e-05	0.000241705
hsa-mir-22,hsa-miR-22-3p	1.99565	14.3843	18.061	2.13942e-05	0.000486932			hsa-mir-18a,hsa-miR-18a-3p	35.8532	-1.46399	0.344415	-4.25066	2.13144e-05	0.000241705
hsa-mir-382,hsa-miR-382-5p	-4.38765	2.74506	17.9363	2.28426e-05	0.000509702			hsa-mir-1285-2,hsa-miR-1285-3p	35.3548	1.95729	0.46129	4.24309	2.20465e-05	0.000245105
hsa-mir-92a-1,hsa-miR-92a-1-5p	-1.81968	8.49468	17.8323	2.41253e-05	0.000527973			hsa-mir-140,hsa-miR-140-3p	105.791	-1.34637	0.318018	-4.23362	2.29962e-05	0.000246023
hsa-mir-940,hsa-miR-940	-1.96617	6.80755	17.6968	2.59061e-05	0.000556248			hsa-mir-200a,hsa-miR-200a-3p	23.327	2.57543	0.608839	4.23007	2.33623e-05	0.000246023
hsa-mir-592,hsa-miR-592	2.78553	6.95874	17.6085	2.71375e-05	0.000571898			hsa-mir-27b,hsa-miR-27b-3p	5652.95	1.7307	0.409207	4.22941	2.34307e-05	0.000246023
hsa-mir-27b,hsa-miR-27b-3p	1.99444	14.4013	17.3847	3.0527e-05	0.000631631			hsa-mir-331,hsa-miR-331-3p	46.9735	-2.93721	0.699415	-4.19952	2.67479e-05	0.000274438
hsa-mir-181a-2,hsa-miR-181a-2-3p	-1.88816	7.36608	16.8421	4.06221e-05	0.000811055			hsa-mir-619,hsa-miR-619-5p	37.0063	3.50505	0.835228	4.19652	2.7105e-05	0.000274438
hsa-let-7e,hsa-let-7e-3p	-3.29666	4.79673	16.8388	4.06935e-05	0.000811055			hsa-mir-1285-1,hsa-miR-1285-3p	34.3222	1.87441	0.449987	4.16546	3.10724e-05	0.000309088
hsa-mir-92b,hsa-miR-92b-5p	-2.44118	7.46209	16.809	4.13367e-05	0.000811055			hsa-mir-665,hsa-miR-665	9.05005	-2.5882	0.641581	-4.03409	5.48147e-05	0.000535861
hsa-mir-378d-2,hsa-miR-378d	3.19075	5.92038	16.6799	4.4247e-05	0.000853442			hsa-mir-433,hsa-miR-433-3p	21.5317	-3.09355	0.768107	-4.0275	5.63742e-05	0.000541766
hsa-mir-582,hsa-miR-582-5p	3.49247	6.61181	16.6128	4.5841e-05	0.000869451			hsa-mir-592,hsa-miR-592	25.6719	2.58676	0.654795	3.95049	7.79912e-05	0.000737017
hsa-mir-1275,hsa-miR-1275	-1.83391	8.94073	16.5089	4.84233e-05	0.000903373			hsa-mir-301b,hsa-miR-301b-3p	39.4798	2.4257	0.61614	3.93693	8.25319e-05	0.00076714
hsa-mir-17,hsa-miR-17-3p	3.48209	6.66411	16.4776	4.92292e-05	0.000903593			hsa-mir-7706,hsa-miR-7706	87.6921	-1.57142	0.400281	-3.92578	8.64478e-05	0.00079058
hsa-mir-197,hsa-miR-197-3p	-1.89311	9.71332	16.3602	5.23737e-05	0.000938254			hsa-mir-106b,hsa-miR-106b-5p	161.87	1.45579	0.372646	3.90662	9.35951e-05	0.000824624
hsa-mir-1307,hsa-miR-1307-5p	1.81134	10.9588	16.346	5.27665e-05	0.000938254			hsa-mir-34a,hsa-miR-34a-5p	39.4577	1.89816	0.486105	3.90482	9.42939e-05	0.000824624
hsa-mir-33a,hsa-miR-33a-5p	7.50629	6.27802	16.1009	6.00569e-05	0.00105146			hsa-mir-3613,hsa-miR-3613-3p	5.35891	-3.27333	0.83841	-3.90421	9.45336e-05	0.000824624
hsa-mir-196b,hsa-miR-196b-5p	-3.82974	5.59657	16.0051	6.31733e-05	0.00108926			hsa-let-7a-1,hsa-let-7a-5p	8180.63	-1.39364	0.357306	-3.90041	9.60306e-05	0.00082499
hsa-mir-378c,hsa-miR-378c	1.87306	8.20965	15.9653	6.45128e-05	0.00109576			hsa-mir-885,hsa-miR-885-5p	10.371	-3.89171	0.998877	-3.89608	9.7762e-05	0.000827329
hsa-mir-500a,hsa-miR-500a-3p	1.77639	8.32318	15.8478	6.86471e-05	0.00114883			hsa-let-7a-2,hsa-let-7a-5p	8189.4	-1.39169	0.357782	-3.88978	0.000100337	0.000831267
hsa-let-7b,hsa-let-7b-3p	-1.84232	9.30105	15.6465	7.63521e-05	0.00125926			hsa-let-7a-3,hsa-let-7a-5p	8191.51	-1.39136	0.358201	-3.8843	0.000102626	0.000831267
hsa-mir-582,hsa-miR-582-3p	3.53507	8.25864	15.6023	7.8161e-05	0.00127067			hsa-mir-409,hsa-miR-409-3p	52.7363	-1.99608	0.513543	-3.88688	0.000101542	0.000831267
hsa-mir-1180,hsa-miR-1180-3p	-1.7816	8.29357	15.376	8.81006e-05	0.00141209			hsa-mir-150,hsa-miR-150-5p	16.2099	-2.92176	0.753259	-3.87882	0.000104964	0.000838231
hsa-mir-378d-1,hsa-miR-378d	2.92533	5.94766	15.3253	9.04948e-05	0.00143032			hsa-mir-484,hsa-miR-484	523.46	-1.49619	0.386298	-3.87316	0.000107434	0.000846044
hsa-mir-301b,hsa-miR-301b-3p	2.59962	7.77788	15.263	9.35295e-05	0.00144973			hsa-mir-16-2,hsa-miR-16-2-3p	39.3551	1.36932	0.354623	3.86133	0.00011277	0.000871216
hsa-mir-409,hsa-miR-409-3p	-1.96099	7.59227	15.2481	9.42705e-05	0.00144973			hsa-mir-582,hsa-miR-582-3p	68.7654	3.13384	0.812711	3.85604	0.00011524	0.000871216
hsa-mir-27a,hsa-miR-27a-3p	2.64959	12.1245	15.1041	0.000101743	0.00154379			hsa-mir-93,hsa-miR-93-3p	70.5799	-1.51004	0.391298	-3.85906	0.000113826	0.000871216
hsa-mir-1285-2,hsa-miR-1285-3p	2.11621	7.23732	15.0715	0.000103516	0.00155002			hsa-mir-577,hsa-miR-577	143.082	2.0271	0.530609	3.82033	0.000133272	0.000994281
hsa-mir-1343,hsa-miR-1343-3p	-2.845	4.40909	14.9438	0.000110764	0.001637			hsa-mir-125b-1,hsa-miR-125b-5p	117.912	-1.35123	0.355211	-3.80402	0.000142365	0.00103302
hsa-mir-577,hsa-miR-577	2.231	9.24598	14.8288	0.000117724	0.0016913			hsa-mir-21,hsa-miR-21-3p	216.182	2.08588	0.547903	3.80702	0.000140649	0.00103302
hsa-mir-6511a-1,hsa-miR-6511a-3p	-6.63998	2.91813	14.8265	0.000117869	0.0016913			hsa-mir-4755,hsa-miR-4755-3p	11.2628	6.44558	1.69562	3.80131	0.00014393	0.00103302
hsa-mir-29b-1,hsa-miR-29b-3p	7.23551	5.9899	14.7897	0.000120191	0.0016913			hsa-mir-125b-2,hsa-miR-125b-5p	117.914	-1.35084	0.356345	-3.79082	0.000150151	0.00106419
hsa-mir-29b-2,hsa-miR-29b-3p	7.23548	5.99147	14.7867	0.000120382	0.0016913			hsa-mir-10a,hsa-miR-10a-5p	21586	1.46946	0.389837	3.76942	0.00016363	0.00113144
hsa-mir-21,hsa-miR-21-3p	2.36693	9.8877	14.6738	0.000127808	0.00177372			hsa-mir-130b,hsa-miR-130b-3p	159.622	0.998328	0.264678	3.77185	0.000162039	0.00113144
hsa-mir-3158-1,hsa-miR-3158-3p	7.13221	5.18263	14.5353	0.000137556	0.001886			hsa-mir-148a,hsa-miR-148a-3p	8623.47	1.31243	0.349718	3.75282	0.000174854	0.00119449
hsa-let-7f-2,hsa-let-7f-2-3p	3.78336	5.29205	14.4406	0.00014465	0.00195966			hsa-mir-92b,hsa-miR-92b-5p	41.261	-2.43906	0.652034	-3.74069	0.000183514	0.00123872
hsa-mir-1285-1,hsa-miR-1285-3p	2.01826	7.25908	14.231	0.000161684	0.00214525			hsa-mir-330,hsa-miR-330-3p	37.2398	-1.84809	0.499487	-3.69997	0.000215623	0.00143833
hsa-mir-1285-1,hsa-miR-1285-5p	2.64881	6.25789	14.226	0.000162119	0.00214525			hsa-mir-181c,hsa-miR-181c-5p	76.4354	2.0616	0.558851	3.689	0.000225139	0.00148435
hsa-mir-502,hsa-miR-502-3p	3.96835	4.82521	14.1796	0.000166166	0.00216597			hsa-mir-941-1,hsa-miR-941	345.258	-1.48989	0.405816	-3.67134	0.000241283	0.0015725
hsa-mir-365b,hsa-miR-365b-5p	-2.36659	5.01519	14.1646	0.000167492	0.00216597			hsa-mir-378d-2,hsa-miR-378d	14.8284	2.97513	0.812832	3.6602	0.000252016	0.00162379
hsa-mir-664b,hsa-miR-664b-3p	-6.43689	2.54535	14.0969	0.000173626	0.00222007			hsa-mir-149,hsa-miR-149-3p	23.6461	-3.27194	0.896009	-3.65168	0.000260533	0.0016598
hsa-mir-760,hsa-miR-760	-1.71543	6.66202	14.0333	0.000179602	0.00227097			hsa-let-7e,hsa-let-7e-3p	4.44623	-3.24045	0.890865	-3.63742	0.000275381	0.0017349
hsa-mir-196a-2,hsa-miR-196a-3p	7.34691	5.17809	13.7981	0.000203542	0.0025454			hsa-mir-582,hsa-miR-582-5p	18.0269	3.17508	0.877509	3.61829	0.000296557	0.00184778
hsa-mir-744,hsa-miR-744-5p	-1.48305	8.91573	13.6801	0.000216739	0.00268096			hsa-mir-378d-1,hsa-miR-378d	15.5274	2.74816	0.760164	3.61523	0.000300086	0.00184944
hsa-let-7e,hsa-let-7e-5p	-1.51167	10.3994	13.6474	0.000220546	0.00269872			hsa-mir-196b,hsa-miR-196b-5p	8.2215	-3.67159	1.01691	-3.61054	0.000305564	0.00186296
hsa-mir-423,hsa-miR-423-5p	-2.01883	14.7756	13.6071	0.000225328	0.00272791			hsa-mir-320a,hsa-miR-320a	1348.54	-1.46406	0.405865	-3.60727	0.000309439	0.00186651
hsa-mir-10a,hsa-miR-10a-5p	1.68537	16.3105	13.5272	0.000235125	0.00281655			hsa-mir-532,hsa-miR-532-3p	10.3664	-2.21995	0.61856	-3.58891	0.000332067	0.00198192
hsa-mir-148a,hsa-miR-148a-3p	1.54285	15.0957	13.3187	0.000262769	0.0031149			hsa-mir-1285-1,hsa-miR-1285-5p	27.1859	2.53505	0.708314	3.57899	0.000344929	0.00201624
hsa-mir-155,hsa-miR-155-5p	-2.6218	5.4801	13.2499	0.000272599	0.00319812			hsa-mir-532,hsa-miR-532-5p	131.058	1.20548	0.336629	3.58103	0.000342244	0.00201624
hsa-mir-2110,hsa-miR-2110	-2.47596	5.58968	13.1969	0.000280415	0.00325624			hsa-mir-149,hsa-miR-149-5p	131.935	-1.38634	0.390618	-3.5491	0.000386548	0.00223646
hsa-mir-181c,hsa-miR-181c-5p	2.26898	8.29464	13.0831	0.000297966	0.0034251			hsa-mir-328,hsa-miR-328-3p	38.3855	-1.45379	0.411701	-3.53119	0.000413693	0.00236933
hsa-mir-3176,hsa-miR-3176	3.67218	5.62025	13.0434	0.000304355	0.00346356			hsa-mir-27a,hsa-miR-27a-3p	1170.34	2.26522	0.645223	3.51075	0.000446845	0.00253361
hsa-mir-204,hsa-miR-204-3p	-6.75135	2.46433	12.9759	0.000315533	0.00355521			hsa-mir-125a,hsa-miR-125a-5p	880.459	-0.975152	0.279282	-3.49165	0.000480054	0.00269496
hsa-mir-144,hsa-miR-144-3p	2.67231	5.28938	12.9516	0.000319642	0.00356621			hsa-mir-561,hsa-miR-561-5p	50.3102	1.86038	0.533928	3.48434	0.00049336	0.0027425
hsa-mir-330,hsa-miR-330-3p	-1.75079	7.19447	12.8973	0.000329061	0.00363565			hsa-mir-17,hsa-miR-17-3p	16.7676	3.12076	0.90023	3.46663	0.000527034	0.00290124
hsa-mir-532,hsa-miR-532-3p	-2.15544	5.32193	12.7762	0.000351064	0.00384144			hsa-mir-1307,hsa-miR-1307-3p	268.65	-0.994742	0.289955	-3.43068	0.000602067	0.00326855
hsa-mir-1972-1,hsa-miR-1972	7.45	3.21343	12.745	0.000356961	0.00386877			hsa-mir-155,hsa-miR-155-5p	8.4135	-2.6181	0.763466	-3.42923	0.000605287	0.00326855
hsa-mir-34a,hsa-miR-34a-5p	1.99563	7.534	12.5862	0.00038861	0.00417206			hsa-mir-365b,hsa-miR-365b-5p	10.3069	-2.37964	0.699123	-3.40376	0.000664662	0.00355532
hsa-mir-4755,hsa-miR-4755-3p	9.0292	4.09538	12.4349	0.000421381	0.00448161			hsa-let-7b,hsa-let-7b-5p	5506	-1.58335	0.468049	-3.38286	0.000717342	0.00369899
hsa-mir-3622a,hsa-miR-3622a-5p	-3.07587	3.83501	12.374	0.000435361	0.00456447			hsa-mir-129-2,hsa-miR-129-2-3p	2.00069	-4.98403	1.47445	-3.38027	0.00072414	0.00369899
hsa-mir-1306,hsa-miR-1306-5p	-2.62293	3.8828	12.3661	0.000437194	0.00456447			hsa-mir-1910,hsa-miR-1910-5p	3.88671	-3.81162	1.12707	-3.38189	0.000719879	0.00369899
hsa-mir-490,hsa-miR-490-3p	-3.95649	5.3507	11.9953	0.000533357	0.00547712			hsa-mir-6847,hsa-miR-6847-5p	1.68688	-5.17445	1.52844	-3.38543	0.000710657	0.00369899
hsa-mir-24-2,hsa-miR-24-3p	2.23128	10.7296	11.9881	0.000535416	0.00547712			hsa-mir-873,hsa-miR-873-5p	6.88039	4.82368	1.42463	3.38592	0.0007094	0.00369899
hsa-mir-24-1,hsa-miR-24-3p	2.23118	10.7316	11.9755	0.000539048	0.00547712			hsa-mir-1343,hsa-miR-1343-3p	6.06265	-2.81945	0.836762	-3.36948	0.000753097	0.00381255
hsa-mir-616,hsa-miR-616-5p	2.3298	5.15497	11.8163	0.000587137	0.00591293			hsa-mir-181a-1,hsa-miR-181a-5p	2800.39	-0.878854	0.263042	-3.34112	0.000834413	0.00415074
hsa-mir-139,hsa-miR-139-5p	-2.02688	4.29784	11.7166	0.000619447	0.0061836			hsa-mir-181a-2,hsa-miR-181a-5p	2800.38	-0.878854	0.263045	-3.34108	0.000834541	0.00415074
hsa-mir-664a,hsa-miR-664a-3p	-2.25056	4.51674	11.4506	0.000714693	0.00707235			hsa-mir-423,hsa-miR-423-5p	7113.08	-1.99724	0.59877	-3.33557	0.000851243	0.004197
hsa-mir-432,hsa-miR-432-5p	-1.88247	7.55925	11.419	0.00072697	0.00710911			hsa-mir-615,hsa-miR-615-3p	314.27	-1.21371	0.365893	-3.31711	0.000909548	0.00444581
hsa-mir-7706,hsa-miR-7706	-1.46075	8.42844	11.3998	0.000734512	0.00710911			hsa-mir-1224,hsa-miR-1224-5p	80.6429	-1.4457	0.436451	-3.31241	0.000924974	0.00448257
hsa-mir-1273a,hsa-miR-1273a	4.08139	3.88935	11.3932	0.000737148	0.00710911			hsa-mir-410,hsa-miR-410-3p	196.474	-1.11114	0.335689	-3.31002	0.000932884	0.00448258
hsa-mir-4687,hsa-miR-4687-5p	-6.31036	2.35853	11.2304	0.000804689	0.00769526			hsa-mir-192,hsa-miR-192-5p	355.008	1.17136	0.355245	3.29732	0.000976105	0.00465085
hsa-mir-484,hsa-miR-484	-1.39367	11.0983	11.1531	0.000838923	0.00795579			hsa-mir-30b,hsa-miR-30b-5p	137.812	-1.39637	0.432533	-3.22836	0.001245	0.00588263
hsa-mir-122,hsa-miR-122-5p	-1.96309	10.4053	11.0302	0.000896409	0.00843069			hsa-mir-144,hsa-miR-144-3p	15.5518	2.44425	0.768935	3.17875	0.00147913	0.00687435
hsa-mir-32,hsa-miR-32-5p	2.2342	7.08111	11.0001	0.000911057	0.0084601			hsa-mir-2110,hsa-miR-2110	11.2467	-2.46205	0.774534	-3.17875	0.00147914	0.00687435
hsa-mir-877,hsa-miR-877-5p	-1.84021	10.1326	10.9933	0.000914404	0.0084601			hsa-mir-1972-1,hsa-miR-1972	4.1389	4.941	1.57387	3.1394	0.00169296	0.00767926
hsa-mir-490,hsa-miR-490-5p	-6.19792	3.23079	10.9008	0.00096124	0.0088217			hsa-mir-382,hsa-miR-382-5p	2.37352	-4.21426	1.34154	-3.14136	0.00168167	0.00767926
hsa-mir-320a,hsa-miR-320a	-1.39924	12.3735	10.8192	0.00100452	0.00914517			hsa-mir-664a,hsa-miR-664a-3p	5.72438	-2.30799	0.734531	-3.14212	0.00167728	0.00767926
hsa-mir-937,hsa-miR-937-3p	-1.89336	4.71492	10.7486	0.00104358	0.00942534			hsa-mir-432,hsa-miR-432-5p	53.4222	-1.87893	0.600755	-3.12761	0.00176236	0.0079306
hsa-mir-5100,hsa-miR-5100	-2.04747	5.27293	10.6511	0.00110003	0.00985697			hsa-mir-139,hsa-miR-139-5p	6.60992	-2.08355	0.667492	-3.12145	0.0017996	0.00803443
								hsa-mir-1226,hsa-miR-1226-5p	21.6433	-1.6817	0.539504	-3.11712	0.00182624	0.00808969
								hsa-mir-1306,hsa-miR-1306-5p	5.27562	-2.59197	0.833572	-3.10947	0.00187424	0.00817459
								hsa-mir-6511a-1,hsa-miR-6511a-3p	1.80126	-4.73576	1.52276	-3.10999	0.00187094	0.00817459
								hsa-mir-5100,hsa-miR-5100	8.69534	-2.07982	0.670809	-3.10047	0.00193217	0.0083629
								hsa-mir-490,hsa-miR-490-3p	5.18377	-3.56008	1.15219	-3.08983	0.00200273	0.00860264
								hsa-mir-200c,hsa-miR-200c-3p	882.686	-1.60508	0.520216	-3.08541	0.00203275	0.00866592
								hsa-mir-616,hsa-miR-616-5p	9.91207	2.19478	0.721506	3.04194	0.00235056	0.00994605

## Sheet: Table S2
EdgeR								DESeq2
logFC	logCPM	LR	PValue	FDR					baseMean	log2FoldChange	lfcSE	stat	pvalue	padj
hsa-mir-146a,hsa-miR-146a-5p	3.72986	11.404	42.2062	8.21408e-11	8.09086e-08			hsa-mir-146a,hsa-miR-146a-5p	435.886	2.94832	0.499498	5.90256	3.57893e-09	3.19241e-06
hsa-mir-1273f,hsa-miR-1273f	-2.01193	5.97455	19.337	1.0956e-05	0.00539585
hsa-mir-205,hsa-miR-205-5p	-3.81966	3.93475	17.7164	2.56401e-05	0.0084185
